# Supplementary material for: Effervescent Atomizer as Novel Cell Spray Technology to Decrease the Gas-to-Liquid Ratio
Source: MDPI journal article supplement (doi:10.3390/pharmaceutics14112421), 2022-11-09
Supplement: s1 [file s1]

# Effervescent Atomizer as Novel Cell Spray Technology to Decrease the Gas-to-Liquid Ratio

Anja Lena Thiebes <sup>1,2,\*,†</sup>, Sarah Klein <sup>1,2,†</sup>, Jonas Zingsheim <sup>1,3</sup>, Georg H. Möller <sup>4</sup>, Stefanie Gürzing <sup>4</sup>, Manuel A. Reddemann <sup>4</sup>, Mehdi Behbahani <sup>3</sup>, Stefan Jockenhoevel <sup>1,2,\*</sup> and Christian G. Cornelissen <sup>1,5</sup>

<sup>1</sup> Department of Biohybrid & Medical Textiles (BioTex), AME—Institute of Applied Medical Engineering, Helmholtz Institute Aachen, RWTH Aachen University, Forckenbeckstraße 55, 52074 Aachen, Germany

<sup>2</sup> Aachen-Maastricht Institute for Biobased Materials, Faculty of Science and Engineering, Maastricht University, Brightlands Chemelot Campus, Urmonderbaan 22, 6167 RD Geleen, The Netherlands

<sup>3</sup> Laboratory Biomaterial, University of Applied Sciences Aachen, Heinrich-Mußmann-Straße 1, 52428 Jülich, Germany

<sup>4</sup> Institute of Heat and Mass Transfer (WSA), RWTH Aachen University, Augustinerbach 6, 52056 Aachen, Germany

<sup>5</sup> Department of Pneumology and Internal Intensive Care Medicine, Medical Clinic V, University Hospital RWTH Aachen, Pauwelsstraße 30, 52074 Aachen, Germany

\* Correspondence: thiebes@ame.rwth-aachen.de (A.L.T.); jockenhoevel@ame.rwth-aachen.de (S.J.); Tel.: +49-241-80-47472 (A.L.T.); +49-241-80-47478 (S.J.)

† These authors contributed equally to this work.

**Table S1.** Percentage of positive ASCs (n=3) cells stained for eight mesenchymal stromal cell-characteristic marker of non-sprayed and sprayed with either gas-to-liquid ratio 2.5% or gas-to-liquid ratio 10% after 7 days of culture. Flow cytometric analysis shows that all experimental conditions fulfill the minimal criterion of Dominici et al. [16] regarding the surface marker expression.

|                           | Percentage of Positive Cells |       |                          |       |                         |       |
|---------------------------|------------------------------|-------|--------------------------|-------|-------------------------|-------|
|                           | Mean ± SD (%)                |       |                          |       |                         |       |
|                           | Control                      |       | gas-to-liquid ratio 2.5% |       | gas-to-liquid ratio 10% |       |
| Minimal Criterion is ≥95% |                              |       |                          |       |                         |       |
| <b>CD90</b>               | 99.57                        | ±0.29 | 99.63                    | ±0.23 | 99.70                   | ±0.17 |
| <b>CD73</b>               | 99.90                        | ±0.00 | 98.47                    | ±2.48 | 99.90                   | ±0.00 |
| <b>CD105</b>              | 99.97                        | ±0.06 | 99.97                    | ±0.06 | 99.97                   | ±0.06 |
| Minimal Criterion is ≤2%  |                              |       |                          |       |                         |       |
| <b>CD45</b>               | 0.00                         | ±0.00 | 0.00                     | ±0.00 | 0.00                    | ±0.00 |
| <b>CD34</b>               | 0.02                         | ±0.03 | 0.03                     | ±0.05 | 0.04                    | ±0.06 |
| <b>CD11b</b>              | 0.00                         | ±0.00 | 0.00                     | ±0.00 | 0.00                    | ±0.00 |
| <b>CD79α</b>              | 0.09                         | ±0.01 | 0.09                     | ±0.04 | 0.08                    | ±0.02 |
| <b>HLA-DR</b>             | 0.01                         | ±0.00 | 0.01                     | ±0.01 | 0.03                    | ±0.02 |

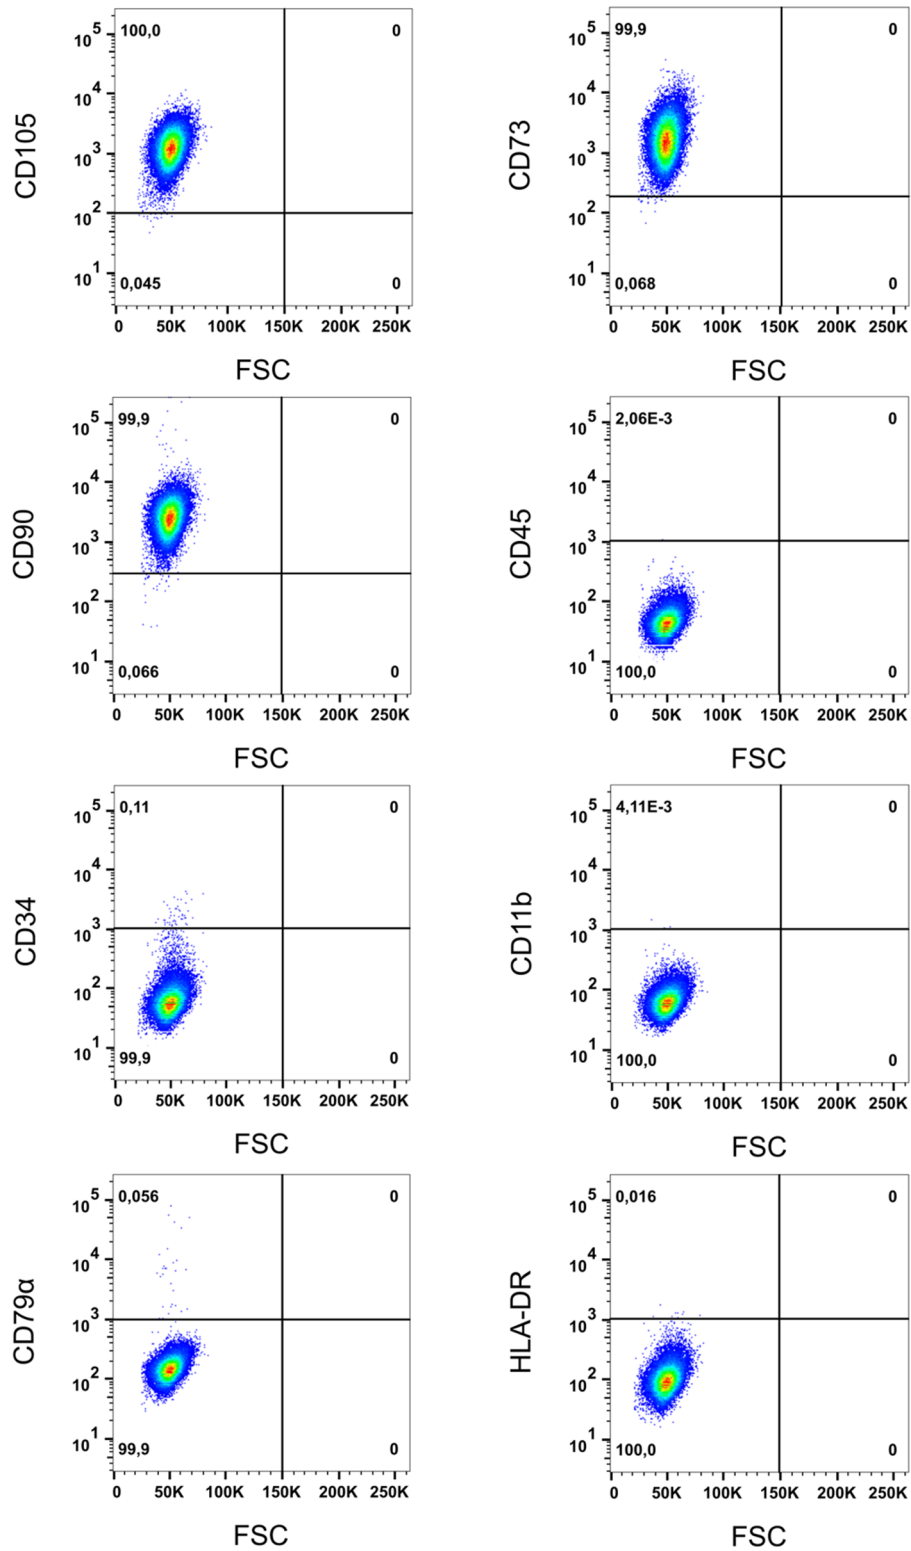

**Figure S1.** Dot plots of flow cytometry measurement (gas-to-liquid ratio 10%) for all examined cell surface markers. The x-axis of the dot plot shows the forward scatter value and the y-axis the intensity of the respective cell surface marker.

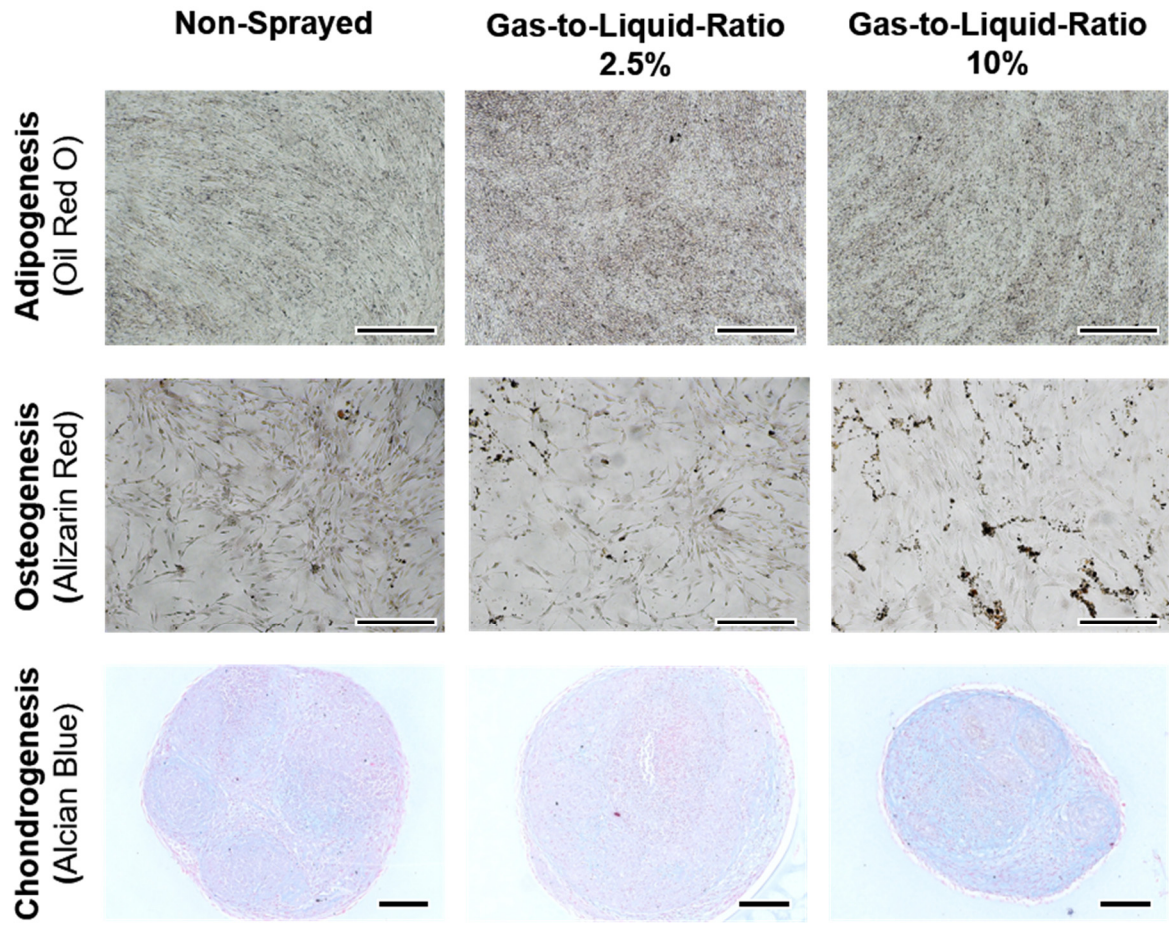

**Figure S2.** Non-sprayed and sprayed (gas-to-liquid ratio 2.5% and 10%) ASCs after culture with full growth medium and staining for adipocytes (top row), osteocytes (middle row, scale bars: 500  $\mu$ m) and chondrocytes (bottom row, scale bar: 200  $\mu$ m).
